# Supplementary material for: Creating Gameful Design in mHealth: A Participatory Co-Design Approach
Source: PubMed Central journal article supplement (PMC6315237; doi:10.2196/11579), 2018-12-14
Supplement: mhealth_v6i12e11579_app1.pdf [file mhealth_v6i12e11579_app1.pdf]

## 2. Table of Game elements

| <b>Game element</b> | <b>Description</b>                                                                                                                                                               |
|---------------------|----------------------------------------------------------------------------------------------------------------------------------------------------------------------------------|
| Own goals           | Goals you can set for yourself                                                                                                                                                   |
| Challenges          | Goals set by friends or the app itself                                                                                                                                           |
| Feedback            | The app can tell you how you're doing, or cheer you on                                                                                                                           |
| Points & trophies   | You can get points for doing activities or tasks or trophies for fulfilling a series of tasks. You can also use a number of points as a threshold for various levels in the game |
| Story               | The app can be in the way of a story or adventure that you embark on, thus pulling you through it                                                                                |
| Theme               | A theme can be making the app, or visuals in it, be metaphors for other things we know.                                                                                          |
| Social features     | Talking with friends, or the opportunity to challenge them.                                                                                                                      |
| Avatar              | An avatar can be a figure/person in the app that you can design to look like you or whatever you like.                                                                           |
